# Supplementary material for: High yield synthesis of electrolyte heating assisted electrochemically exfoliated graphene for electromagnetic interference shielding applications
Source: Royal Society of Chemistry journal article supplement (doi:10.1039/c4ra17230b), 2015-01-01
Supplement: c4ra17230b1.pdf [file c4ra17230b1.pdf]

## † Electronic Supplementary Information (ESI)

### High yield synthesis of electrolyte heating assisted electrochemically exfoliated graphene for electromagnetic interference shielding applications

Prashant Tripathi<sup>a</sup>, Ch. Ravi Prakash Patel<sup>a</sup>, Abhishek Dixit<sup>a</sup>, Avanish Pratap Singh<sup>b</sup>, Pawan Kumar<sup>b</sup>, M. A. Shaz<sup>a</sup>, Ritu Srivastava<sup>b</sup>, Govind Gupta<sup>b</sup>, S. K. Dhawan<sup>b</sup>, Bipin Kumar Gupta<sup>b</sup> and O. N. Srivastava<sup>a,\*</sup>

<sup>a</sup>*Nanoscience Centre, Department of Physics (Centre of Advanced Studies),*

*Banaras Hindu University, Varanasi- 221005, India*

<sup>b</sup>*CSIR- National Physical Laboratory, New Delhi-110 012, India*

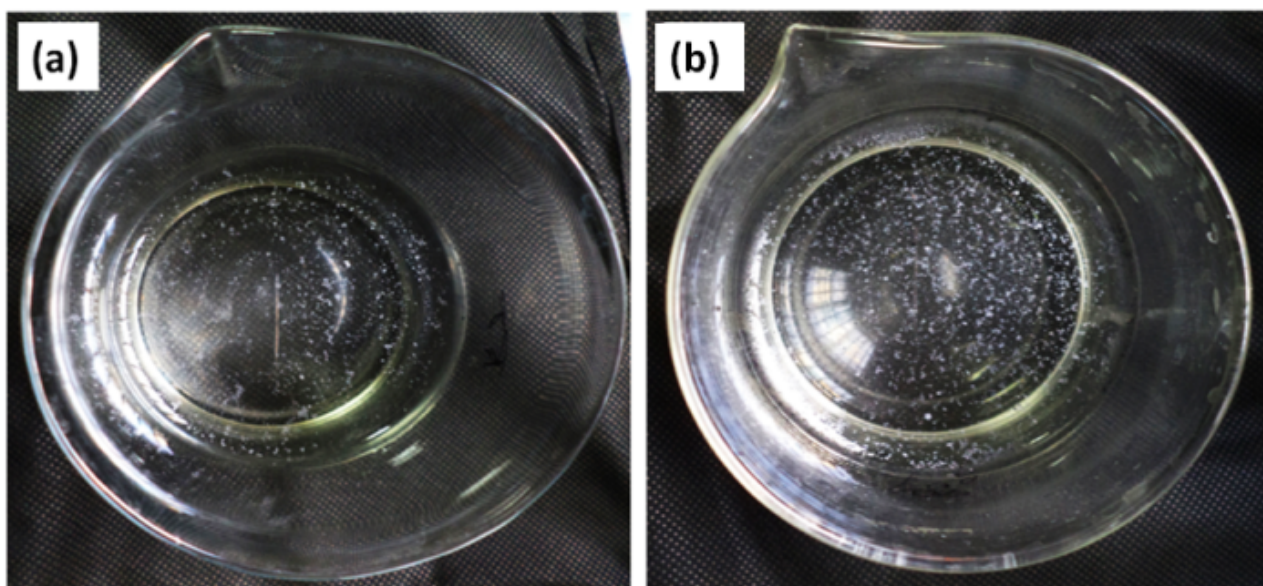

**Fig. S1.** Optical images for thin graphitic sheets after exfoliation at (a) room temperature (b) 80 °C.

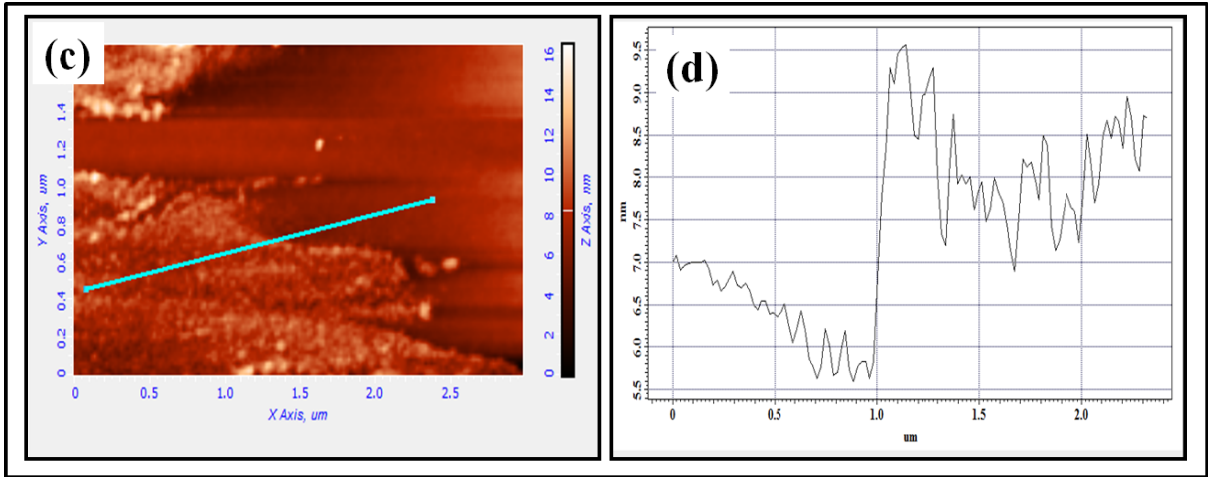

**Fig. S2.** Typical AFM image of exfoliated graphene nanosheets.

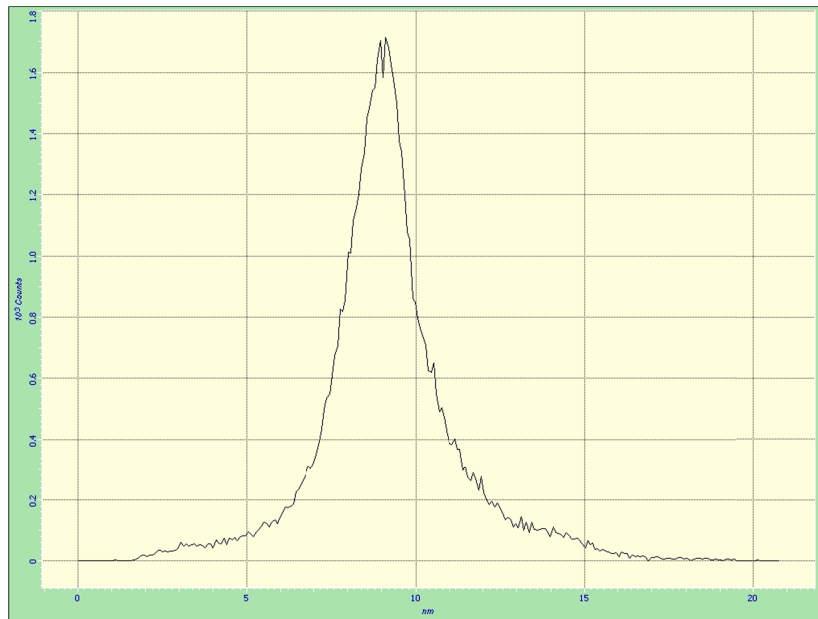

**Fig. S3.** Histogram for height profile of graphene nanosheets.

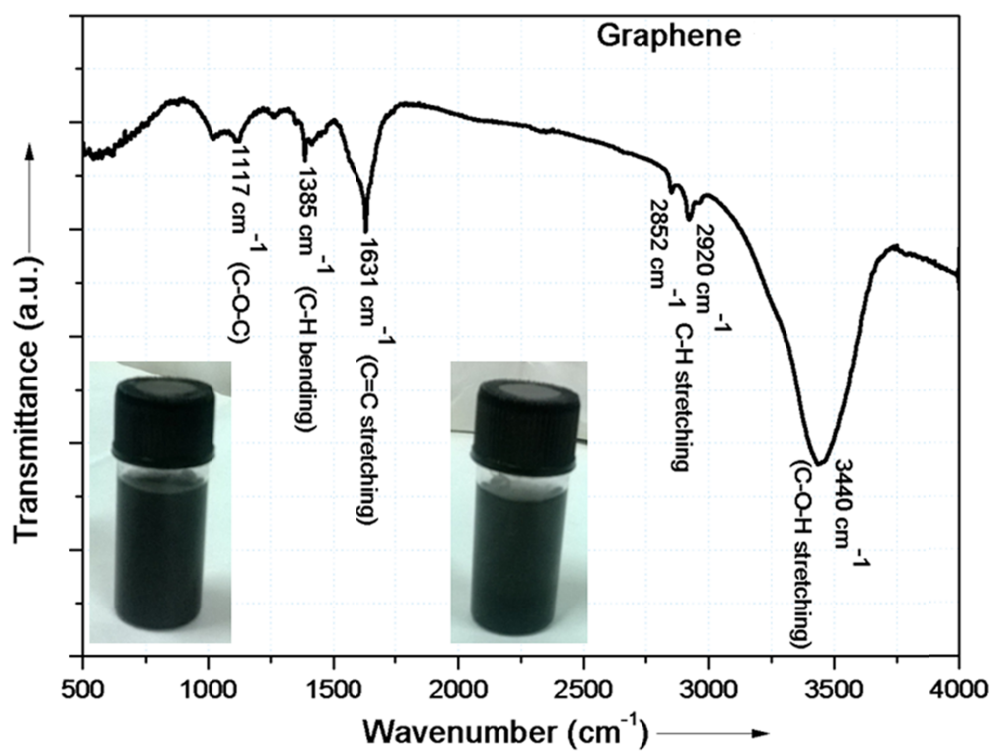

Fig. S4. FTIR spectrum of graphene block.
